# Supplementary material
Source: publisher figshare collection journal article supplement (https://acs.figshare.com/ndownloader/files/3884092)

# Supporting Information for:

## Correlation of methane activation and oxide catalyst reducibility and its implications for oxidative coupling

*Gaurav Kumar, Sai Lap Jacky Lau, Matthew D. Krcha, Michael J. Janik \**

*Department of Chemical Engineering, The Pennsylvania State University, University Park, PA*

*16802*

*mjanik@engr.psu.edu*

Information available:

Table S1. Valence configurations for metal oxides with transition metal dopants

Table S2. *K-point* sampling with the third vector perpendicular to the surface, and the meshes used for the metal oxides

Table S3A. Lattice constants of the metal oxides

Table S3B. Surface facets, number of atomic layers, number of frozen layers, and the number of atoms in the surface slab for each metal oxide

Table S3C. Atomistic structures of bulk, and bare, oxygen vacant, H-adsorbed and  $\cdot\text{CH}_3$  adsorbed surfaces of different metal oxides

Table S4. Values for Fermi energy, energy in the vacuum and work function

Table S5. Oxygen vacancy formation energy  $\Delta E_{vac}$ , C-H activation reaction energy  $\Delta E_{act}$ ,  $\cdot\text{CH}_3$  adsorption energy  $\Delta E_{ads}$  of all the pure/doped oxides used in the universal correlation

Table S6. Statistical details of the correlation between C-H bond activation of methane  $\Delta E_{act}$  and the oxygen vacancy formation energy  $\Delta E_{vac}$

Table S7. The position of oxygen vacancies in various stable oxidation states of  $\text{TbO}_x$  in a mirrored  $\text{Tb}_{16}\text{O}_{32}$  surface slab

**Table S1.** Valence configurations for metal oxides with transition metal dopants

| Metal Oxide      | Dopant | Valence Configuration |
|------------------|--------|-----------------------|
| CeO <sub>2</sub> | Ag     | $4d^{10}5s^1$         |
|                  | Mn     | $3d^64s^1$            |
|                  | Ni     | $3d^84s^2$            |
|                  | Pd     | $4d^95s^1$            |
|                  | Pt     | $5d^96s^1$            |
|                  | V      | $3d^44s^1$            |
|                  | W      | $5d^46s^2$            |
|                  | Zn     | $3d^{10}4p^2$         |
|                  | Zr     | $4s^24p^64d^25s^2$    |

| Metal Oxide | Dopant | Valence Configuration |
|-------------|--------|-----------------------|
| MgO         | Be     | $2s^2$                |
|             | Cr     | $3d^54s^1$            |
|             | Cu     | $3d^{10}4p^1$         |
|             | Eu     | $5s^25p^64f^76s^2$    |
|             | Fe     | $3d^74s^1$            |
|             | Ga     | $4s^24p^1$            |
|             | Ge     | $4s^24p^2$            |
|             | In     | $5s^25p^1$            |
|             | Li     | $1s^12s^12p^1$        |
|             | Mn     | $3d^64s^1$            |
|             | Ni     | $3d^84s^2$            |
|             | Pd     | $4d^95s^1$            |

| Metal Oxide      | Dopant | Valence Configuration  |
|------------------|--------|------------------------|
| TiO <sub>2</sub> | Ce     | $4s^24p^64f^15d^16s^2$ |
|                  | Fe     | $3p^63d^74s^1$         |
|                  | Zr     | $4s^24p^64d^25s^2$     |

**Table S2.** *K-point* sampling with the third vector perpendicular to the surface, and the meshes used for the metal oxides. For doped systems, similar *k-point* was used as the host oxide

| Metal Oxide              | <i>k-points</i> |
|--------------------------|-----------------|
| Anatase TiO <sub>2</sub> | 3x3x1           |
| CeO <sub>2</sub>         | 2x2x1           |
| MgO                      | 3x3x1           |
| Rutile TiO <sub>2</sub>  | 3x3x1           |
| TbO <sub>x</sub>         | 2x2x1           |
| ZnO                      | 3x3x1           |

**Table S3A.** Lattice constants of the metal oxides

| Metal Oxides             | Lattice constants (in Å) |
|--------------------------|--------------------------|
| Anatase TiO <sub>2</sub> | a = b = 3.789, c = 9.817 |
| CeO <sub>2</sub>         | a = b = c = 5.481        |
| MgO                      | a = b = c = 4.234        |
| TbO <sub>x</sub>         | a = b = c = 5.449        |
| Rutile TiO <sub>2</sub>  | a = b = 4.594, c = 2.959 |
| ZnO                      | a = b = 3.283, c = 5.260 |

**Table S3B.** Surface facets, number of atomic layers, number of frozen layers, and the number of atoms in the surface slab for each metal oxide

| Metal Oxides                        | Mirrored/<br>Non-mirrored | Surface<br>facets | Number<br>of atomic<br>layers | Number of<br>frozen<br>layers | Number of atoms |        |
|-------------------------------------|---------------------------|-------------------|-------------------------------|-------------------------------|-----------------|--------|
|                                     |                           |                   |                               |                               | Metal           | Oxygen |
| Anatase TiO <sub>2</sub>            | Non-mirrored              | 100               | 4                             | 0                             | 16              | 32     |
| Anatase TiO <sub>2</sub>            | Non-mirrored              | 101               | 2                             | 0                             | 16              | 32     |
| Anatase TiO <sub>2</sub><br>(doped) | Non-mirrored              | 001               | 4                             | 2                             | 16              | 32     |
| CeO <sub>2</sub><br>(pure/doped)    | Mirrored                  | 111               | 4                             | 0                             | 16              | 32     |
| MgO                                 | Mirrored                  | 110               | 11                            | 0                             | 44              | 44     |
| MgO                                 | Non-mirrored              | 100               | 4                             | 2                             | 32              | 32     |
| MgO<br>(pure/doped)                 | Mirrored                  | 100               | 5                             | 1                             | 40              | 40     |
| Rutile TiO <sub>2</sub>             | Non-mirrored              | 110               | 3                             | 0                             | 24              | 48     |
| TbO <sub>x</sub>                    | Mirrored                  | 111               | 4                             | 0                             | 16              | 16x    |
| ZnO                                 | Non-mirrored              | 001               | 5                             | 0                             | 40              | 40     |
| ZnO                                 | Non-mirrored              | 100               | 5                             | 0                             | 40              | 40     |
| ZnO                                 | Non-mirrored              | 110               | 5                             | 0                             | 40              | 40     |

**Table S3C.** Atomistic structures of bulk, and bare, oxygen vacant, H-adsorbed and  $\cdot\text{CH}_3$  adsorbed surfaces of different metal oxides

Side views of bulk a) Anatase  $\text{TiO}_2$ , b)  $\text{CeO}_2$ , c)  $\text{MgO}$ , d) Rutile  $\text{TiO}_2$ , e)  $\text{TbO}_2$ , and f)  $\text{ZnO}$ . Ti is shown in grey, Ce in off white, Mg in bright green, Tb in turquoise, Zn in blueish grey, and O in red.

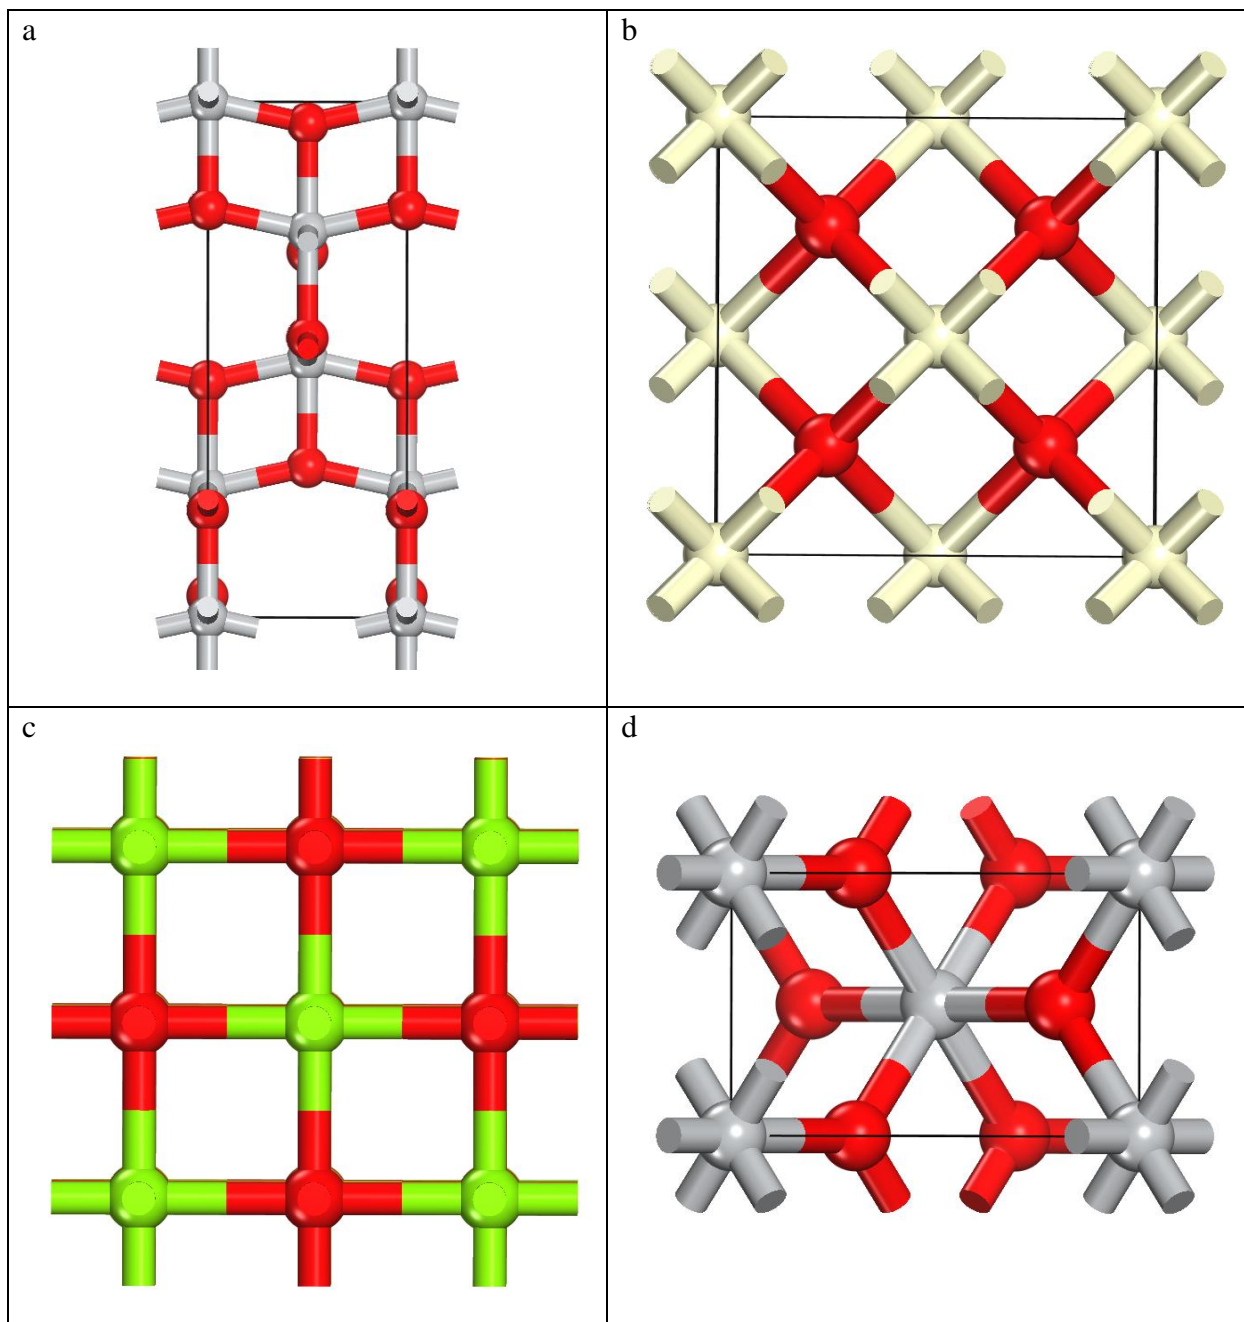

e

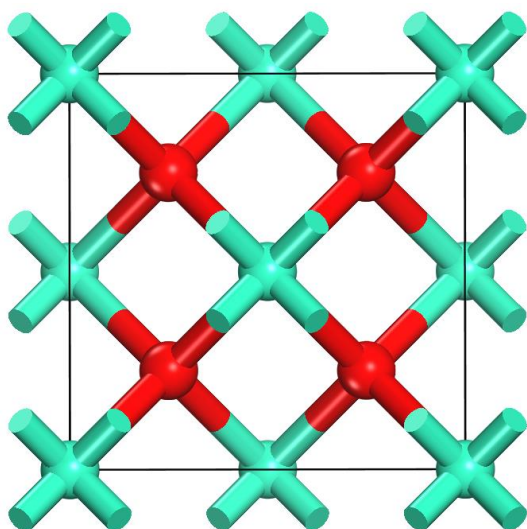

f

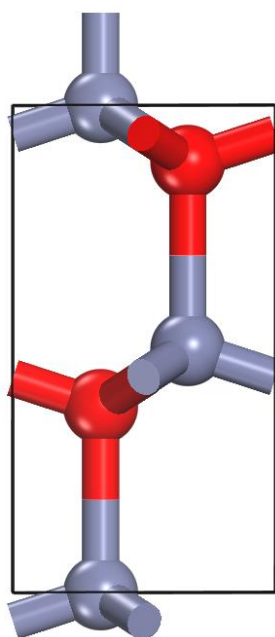

Side views of anatase  $\text{TiO}_2$  (100) a) bare surface, b) oxygen vacant surface at the bridge (missing oxygen is shown as a dotted circle), with c) H adsorbed at the bridging oxygen, and d)  $\cdot\text{CH}_3$  adsorbed at the bridging oxygen. Ti is shown in grey (light), O is shown in red (dark), C in dark grey, and H in white.

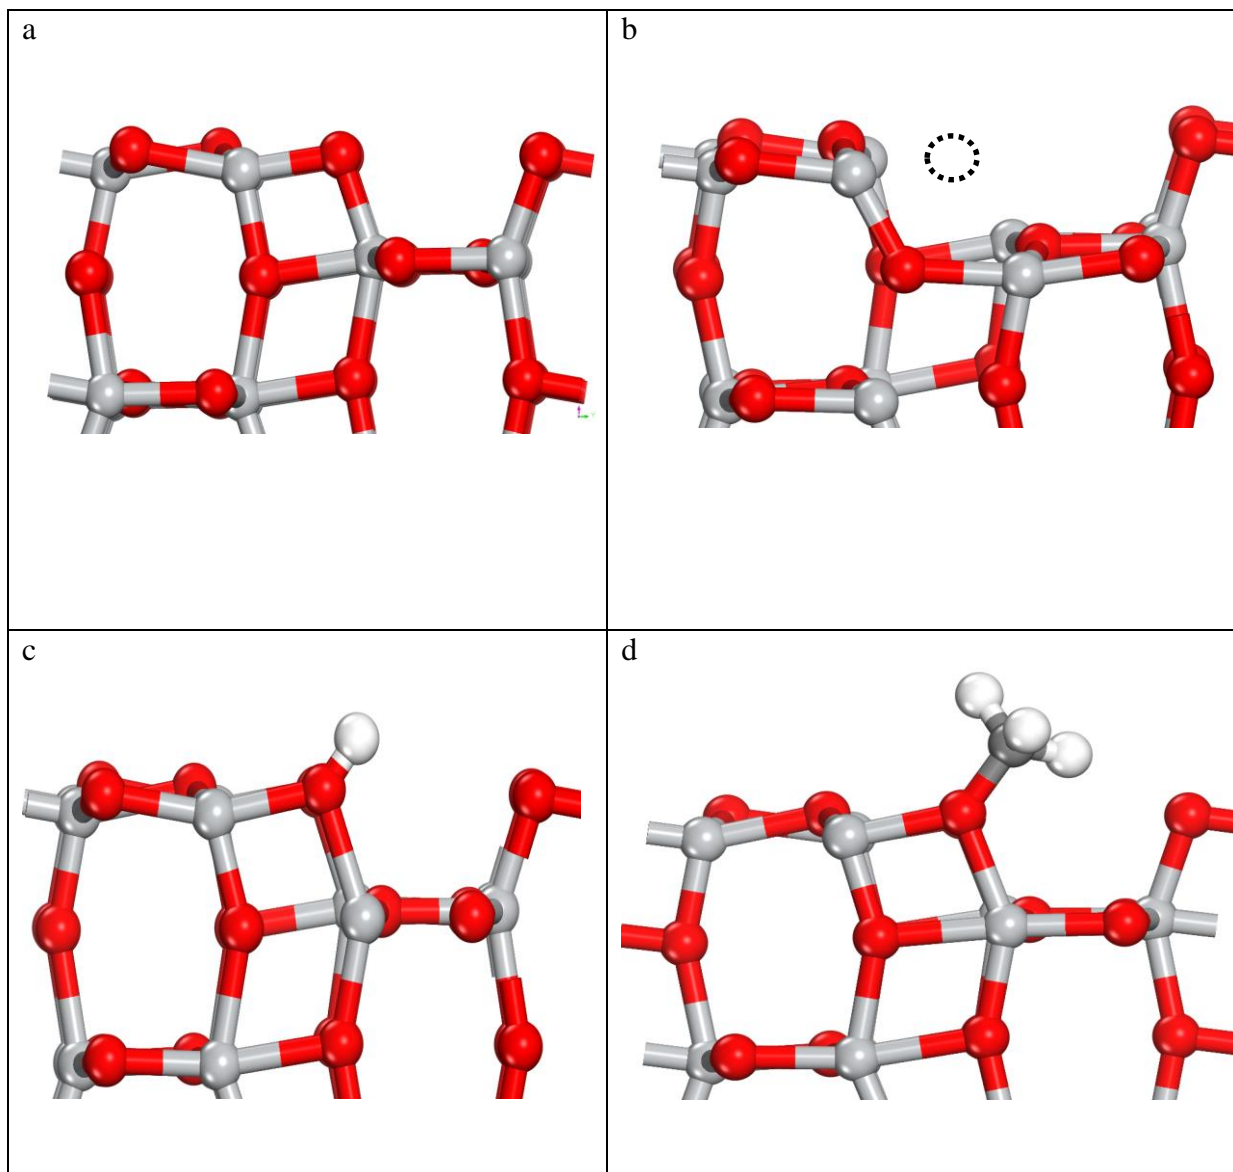

Side views of anatase  $\text{TiO}_2$  (100) a) bare surface, b) oxygen vacant surface in plane (missing oxygen is shown as a dotted circle), with c) H adsorbed at the in-planed oxygen, and d)  $\cdot\text{CH}_3$  adsorbed at the in-planed oxygen. Ti is shown in grey (light), O is shown in red (dark), C in dark grey, and H in white.

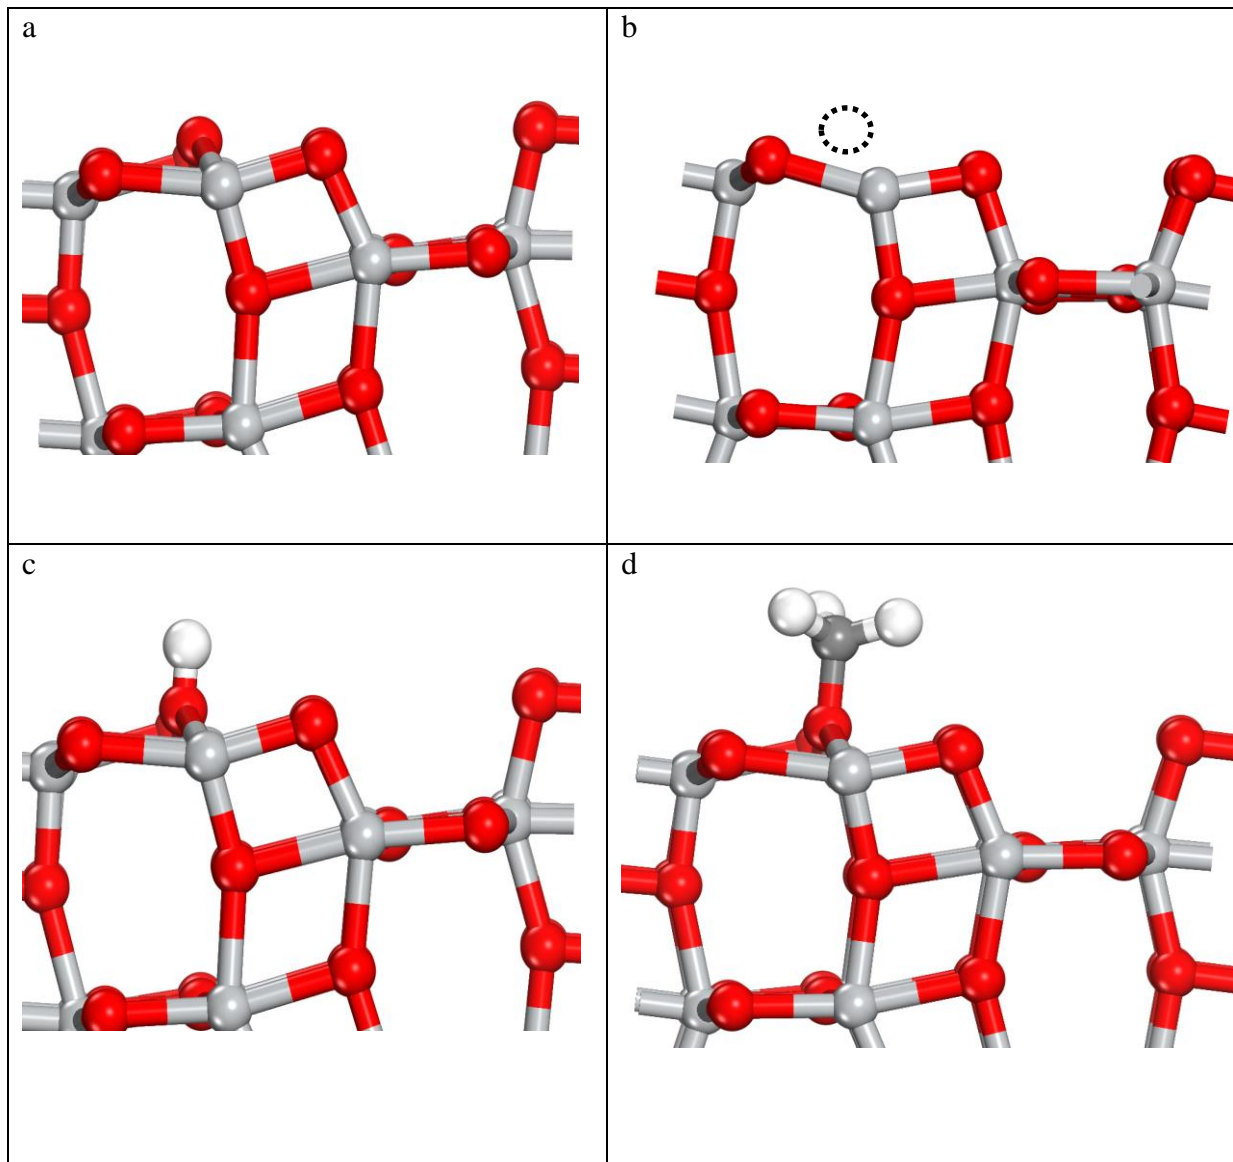

Side views of anatase  $\text{TiO}_2$  (101) a) bare surface, b) oxygen vacant surface at the bridge (missing oxygen is shown as a dotted circle), with c) H adsorbed at the bridging oxygen, and d)  $\cdot\text{CH}_3$  adsorbed at the bridging oxygen. Ti is shown in grey (light), O is shown in red (dark), C in dark grey, and H in white.

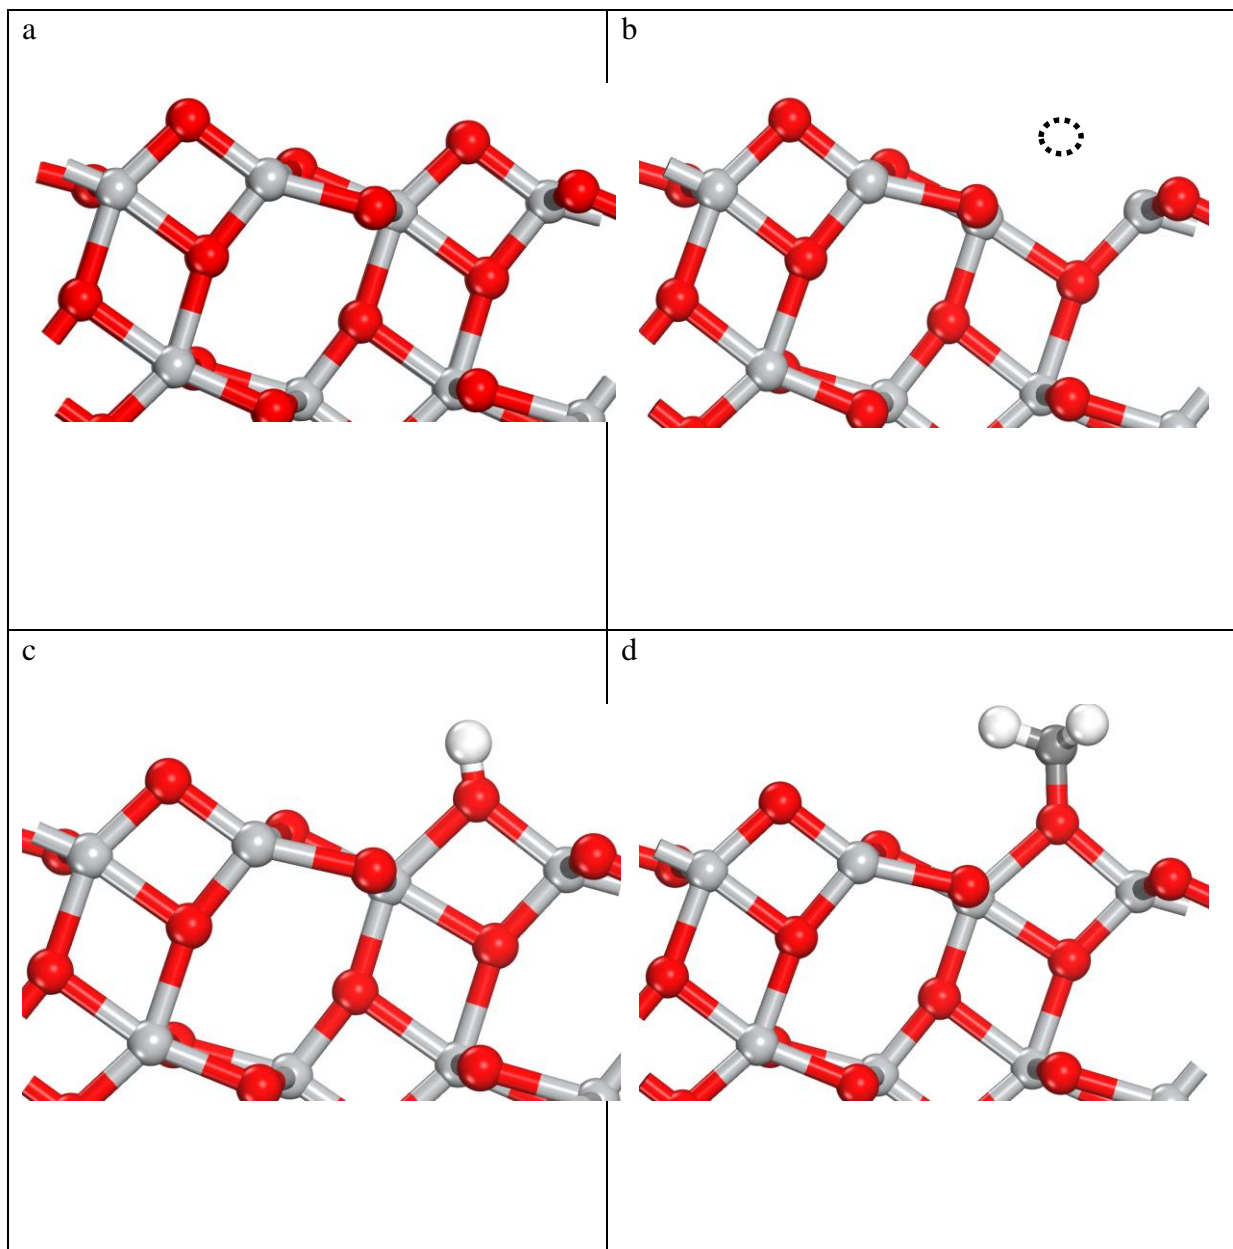



Side views of anatase  $\text{TiO}_2$  (101) a) bare surface, b) oxygen vacant surface in the plane (missing oxygen is shown as a dotted circle), with c) H adsorbed at the in-planed oxygen, and d)  $\cdot\text{CH}_3$  adsorbed at the in-planed oxygen. Ti is shown in grey (light), O is shown in red (dark), C in dark grey, and H in white.

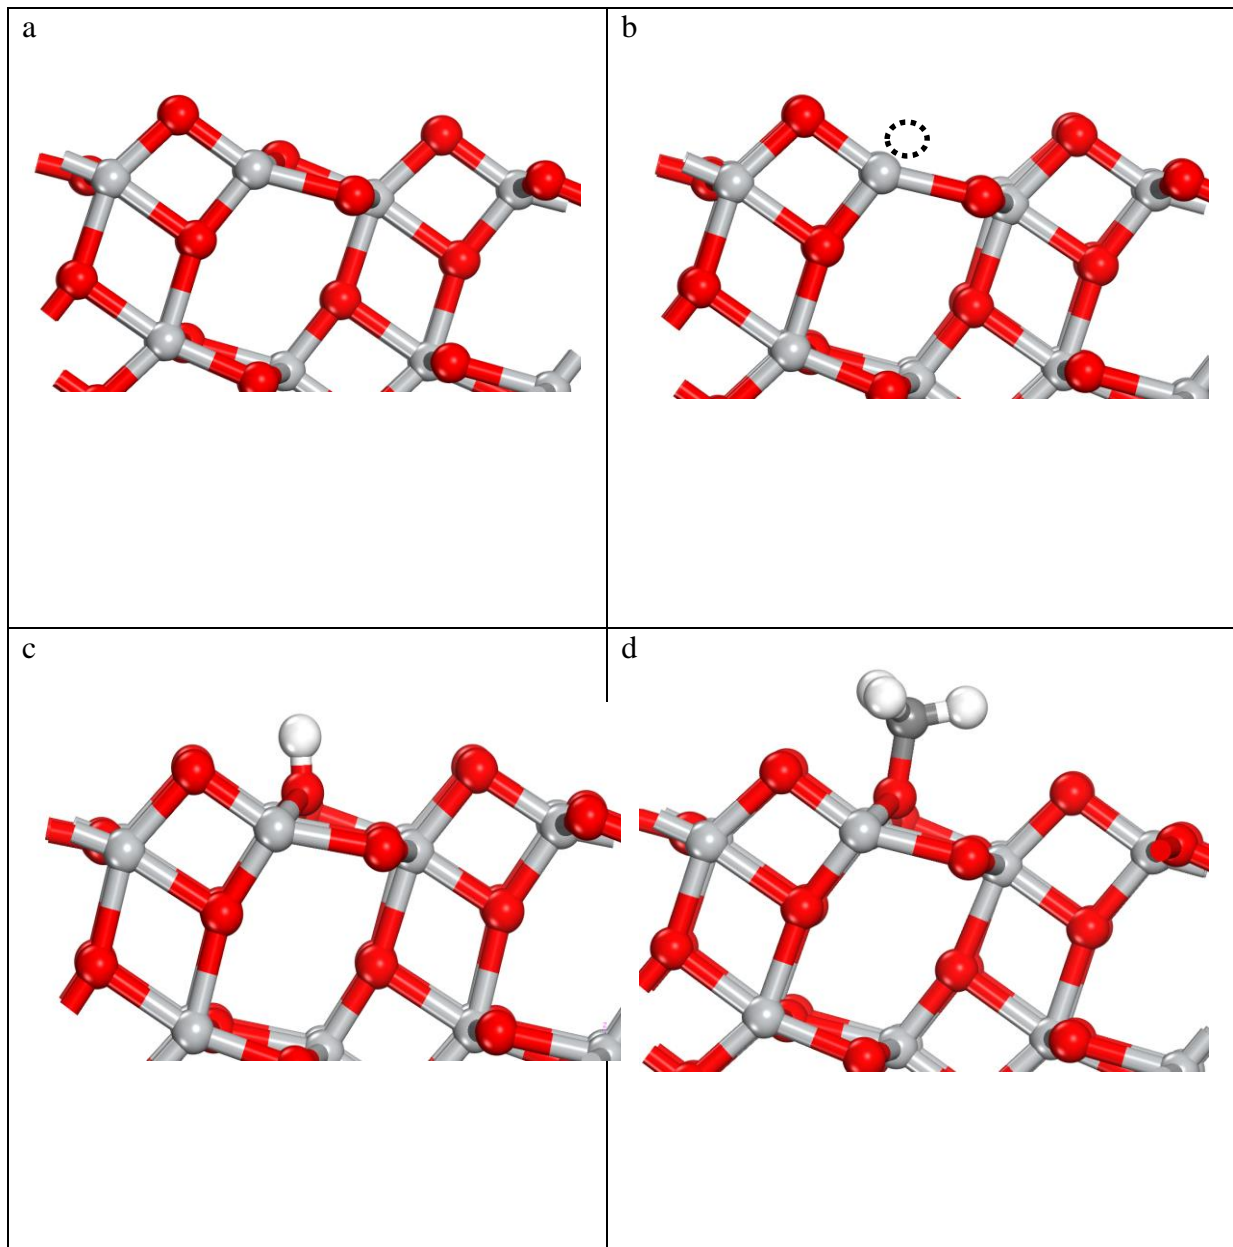

Side views of Ce doped anatase  $\text{TiO}_2$  (001) a) bare surface, b) oxygen vacant surface (missing oxygen is shown as a dotted circle), with c) H adsorbed, and d)  $\cdot\text{CH}_3$  adsorbed. Ce is shown in off white (light), Ti is shown in grey (light), O is shown in red (dark), C in dark grey, and H in white.

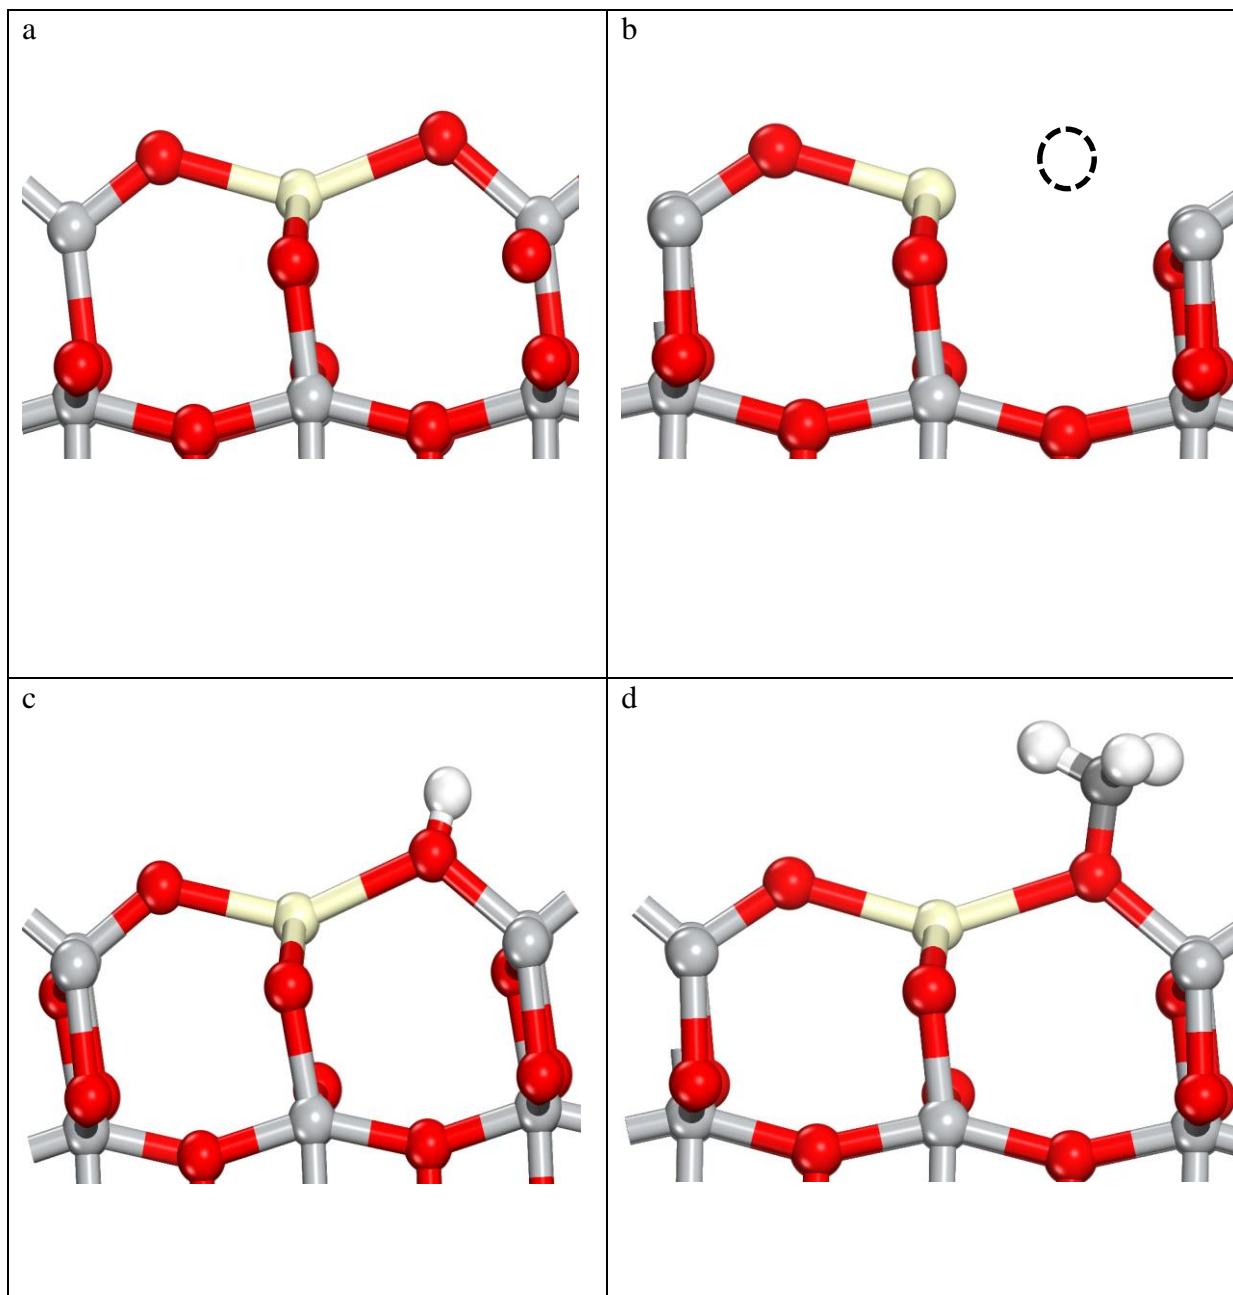

Side views of Ag doped CeO<sub>2</sub> (111) a) bare surface, b) oxygen vacant surface (missing oxygen is shown as a dotted circle), with c) H adsorbed, and d) ·CH<sub>3</sub> adsorbed. Ag is shown in purple (light), Ce is shown in off white (light), O is shown in red (dark), C in dark grey, and H in white.

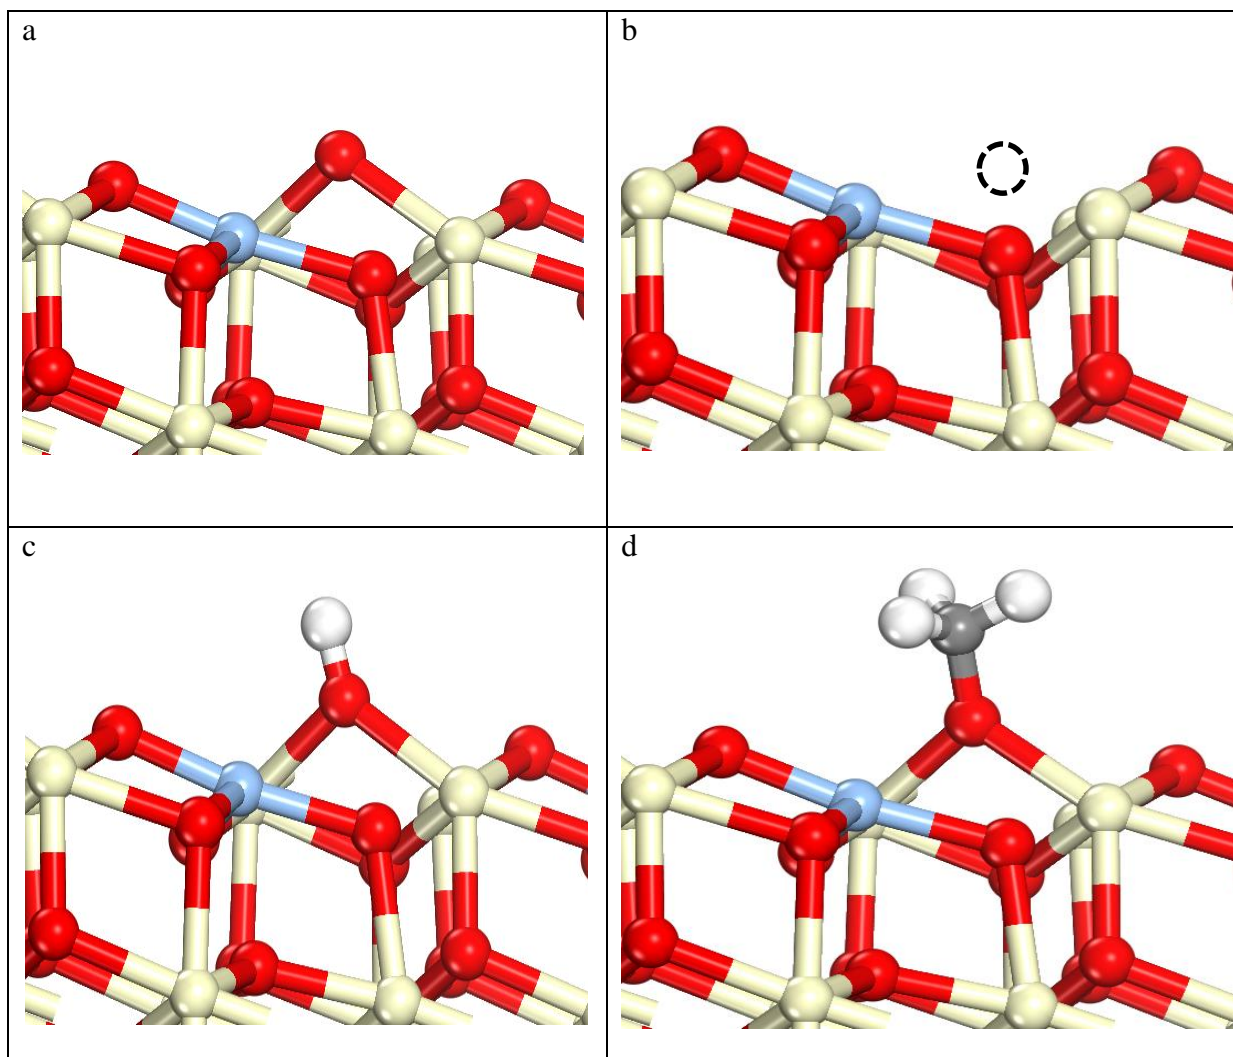

Side views of MgO (110) a) bare surface, b) oxygen vacant surface (missing oxygen is shown as a dotted circle), with c) H adsorbed, and d)  $\cdot\text{CH}_3$  adsorbed. Mg is shown in green (light), O is shown in red (dark), C in dark grey, and H in white.

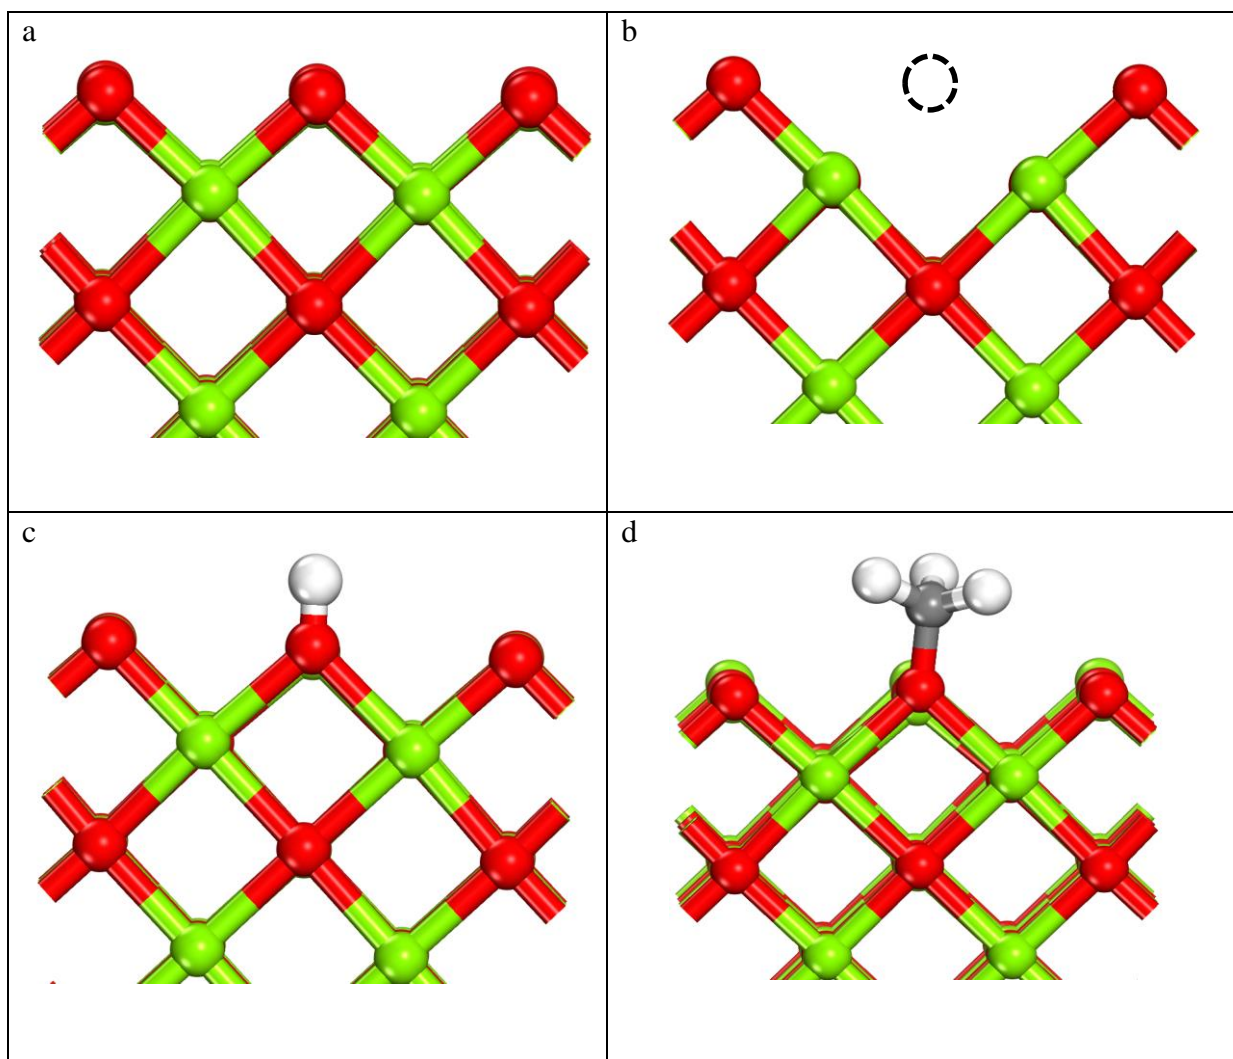

Top view of Pd doped MgO (100) a) bare surface. Side views of Pd doped MgO (100) surface with b) oxygen vacant surface (missing oxygen is shown as a dotted circle), c) H adsorbed, and d)  $\cdot\text{CH}_3$  adsorbed. Pd is shown in blue (grey), Mg is shown in green (light), O is shown in red (dark), C in dark grey, and H in white.

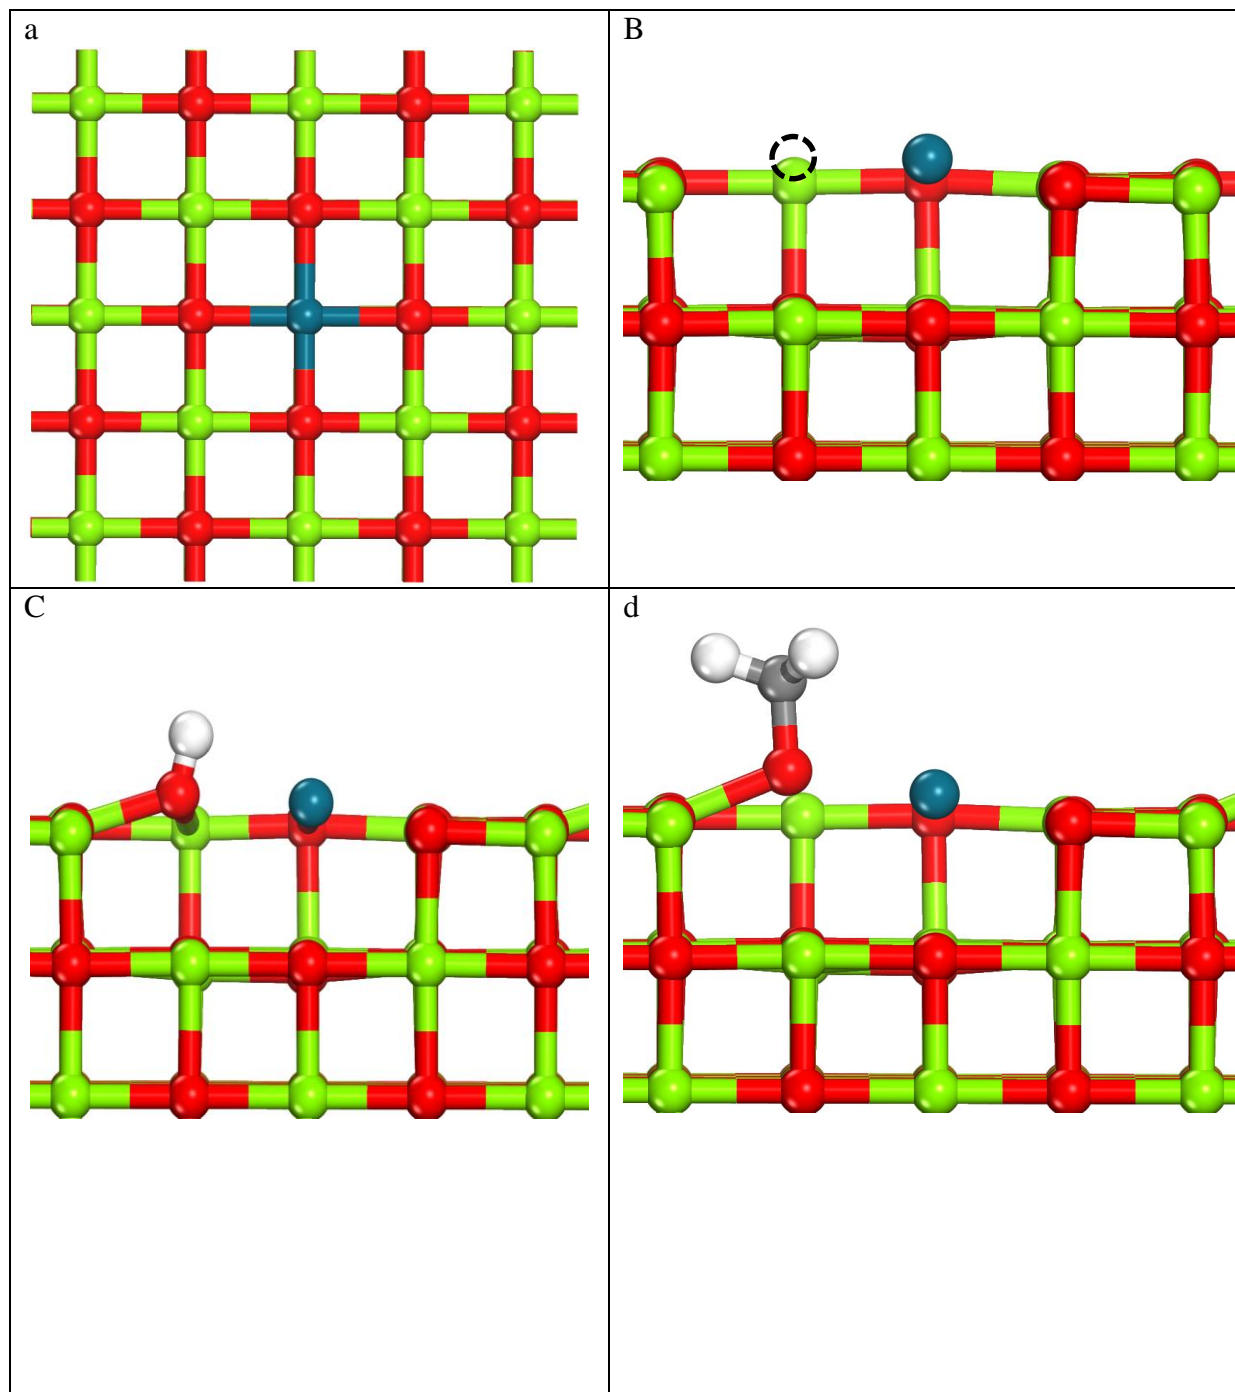



Side views of rutile  $\text{TiO}_2$  (110) a) bare surface, b) oxygen vacant surface at the bridge (missing oxygen is shown as a dotted circle), with c) H adsorbed at the bridging oxygen, and d)  $\cdot\text{CH}_3$  adsorbed at the bridging oxygen. Ti is shown in grey (light), O is shown in red (dark), C in dark grey, and H in white.

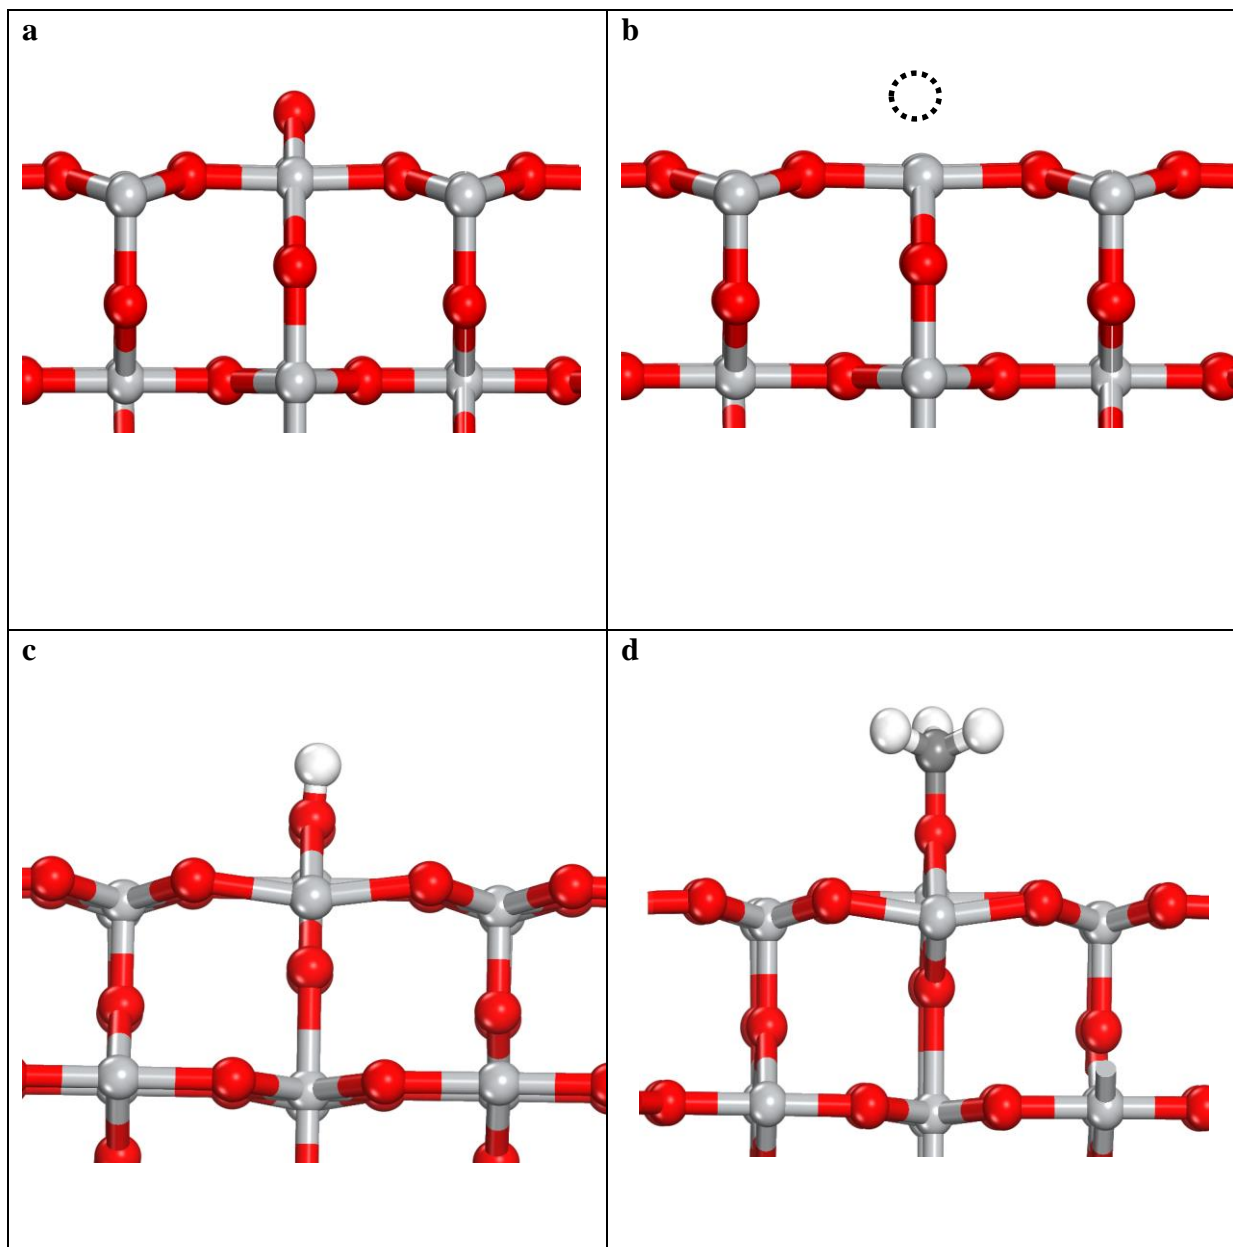

Side views of  $\text{TbO}_2$  (111) a) bare surface, b) oxygen vacant surface (missing oxygen is shown as a dotted circle), with c) H adsorbed, and d)  $\cdot\text{CH}_3$  adsorbed. Tb is shown in green (light), O is shown in red (dark), C in dark grey, and H in white.

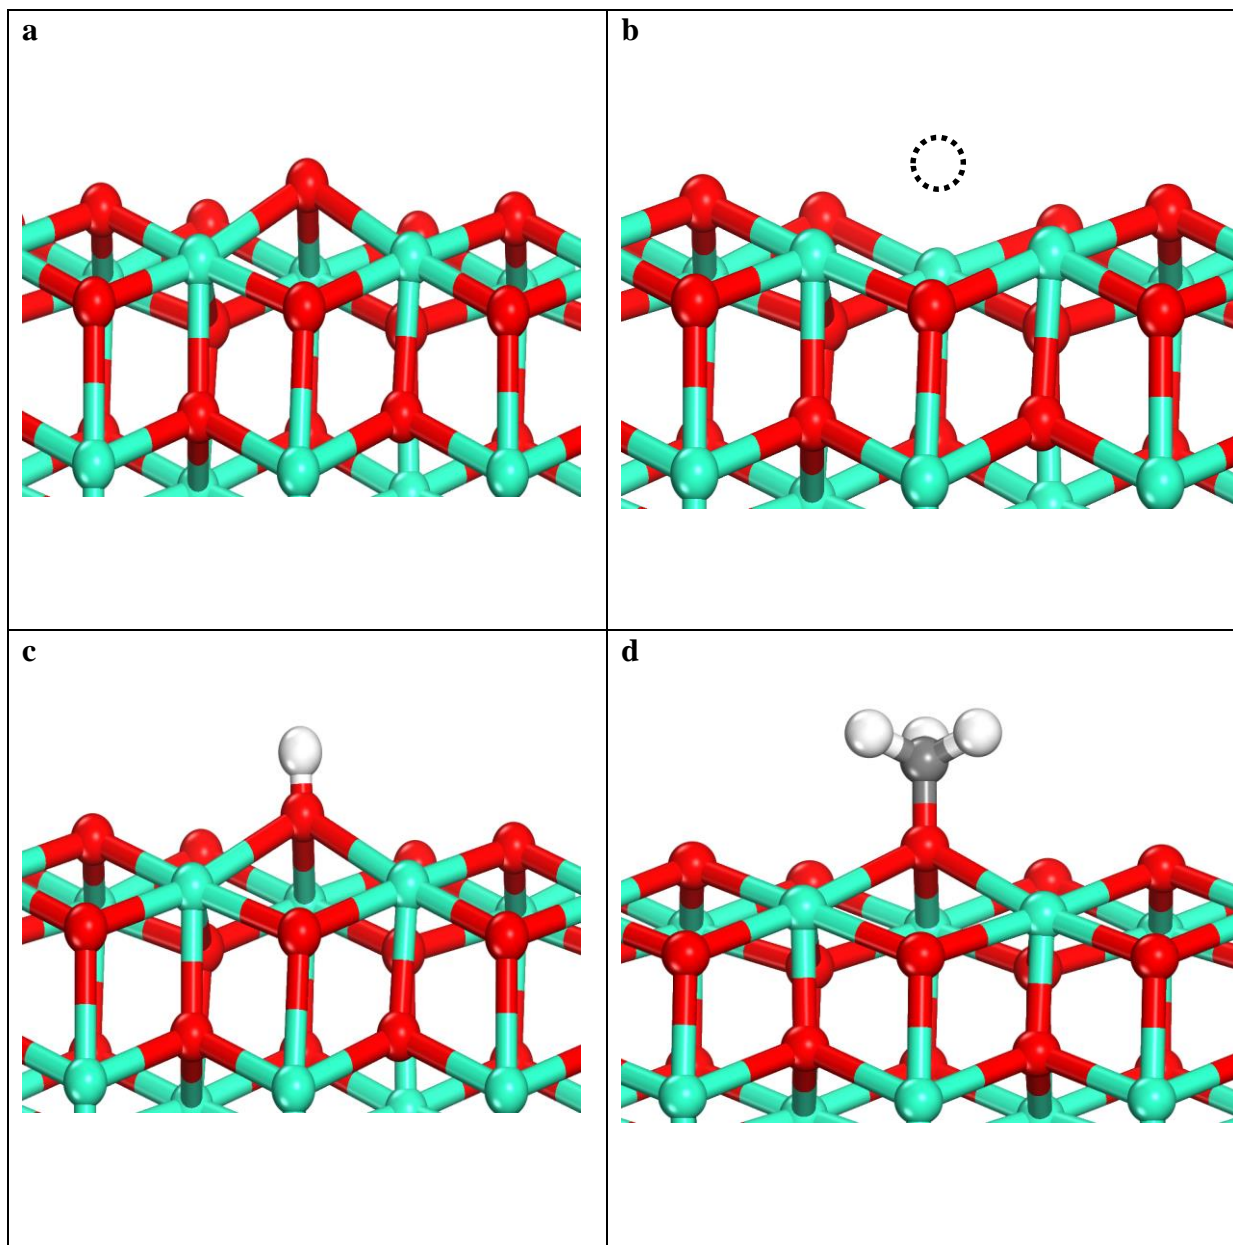

Side views of ZnO (001) a) bare surface, b) oxygen vacant surface (missing oxygen is shown as a dotted circle), with c) H adsorbed, and d)  $\cdot\text{CH}_3$  adsorbed. Zn is shown as grey (light), O is shown in red (dark), C in dark grey, and H in white.

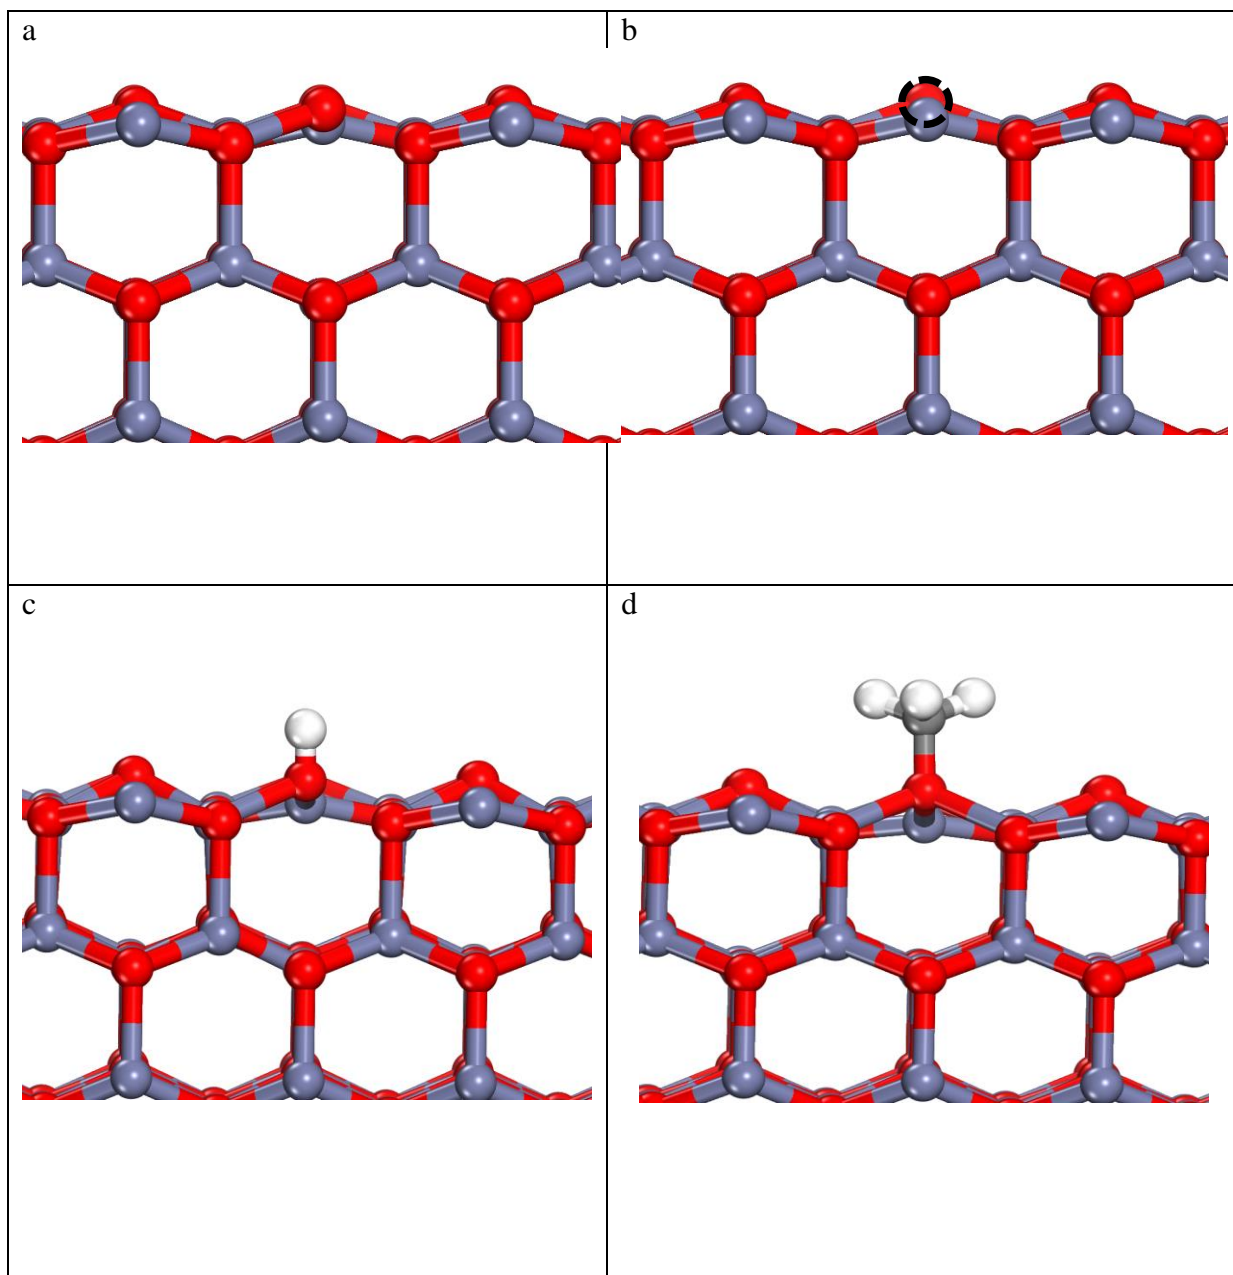



Side views of ZnO (100) a) bare surface, b) oxygen vacant surface (missing oxygen is shown as a dotted circle, with c) H adsorbed, and d)  $\cdot\text{CH}_3$  adsorbed. Zn is shown as grey (light), O is shown in red (dark), C in dark grey, and H in white.

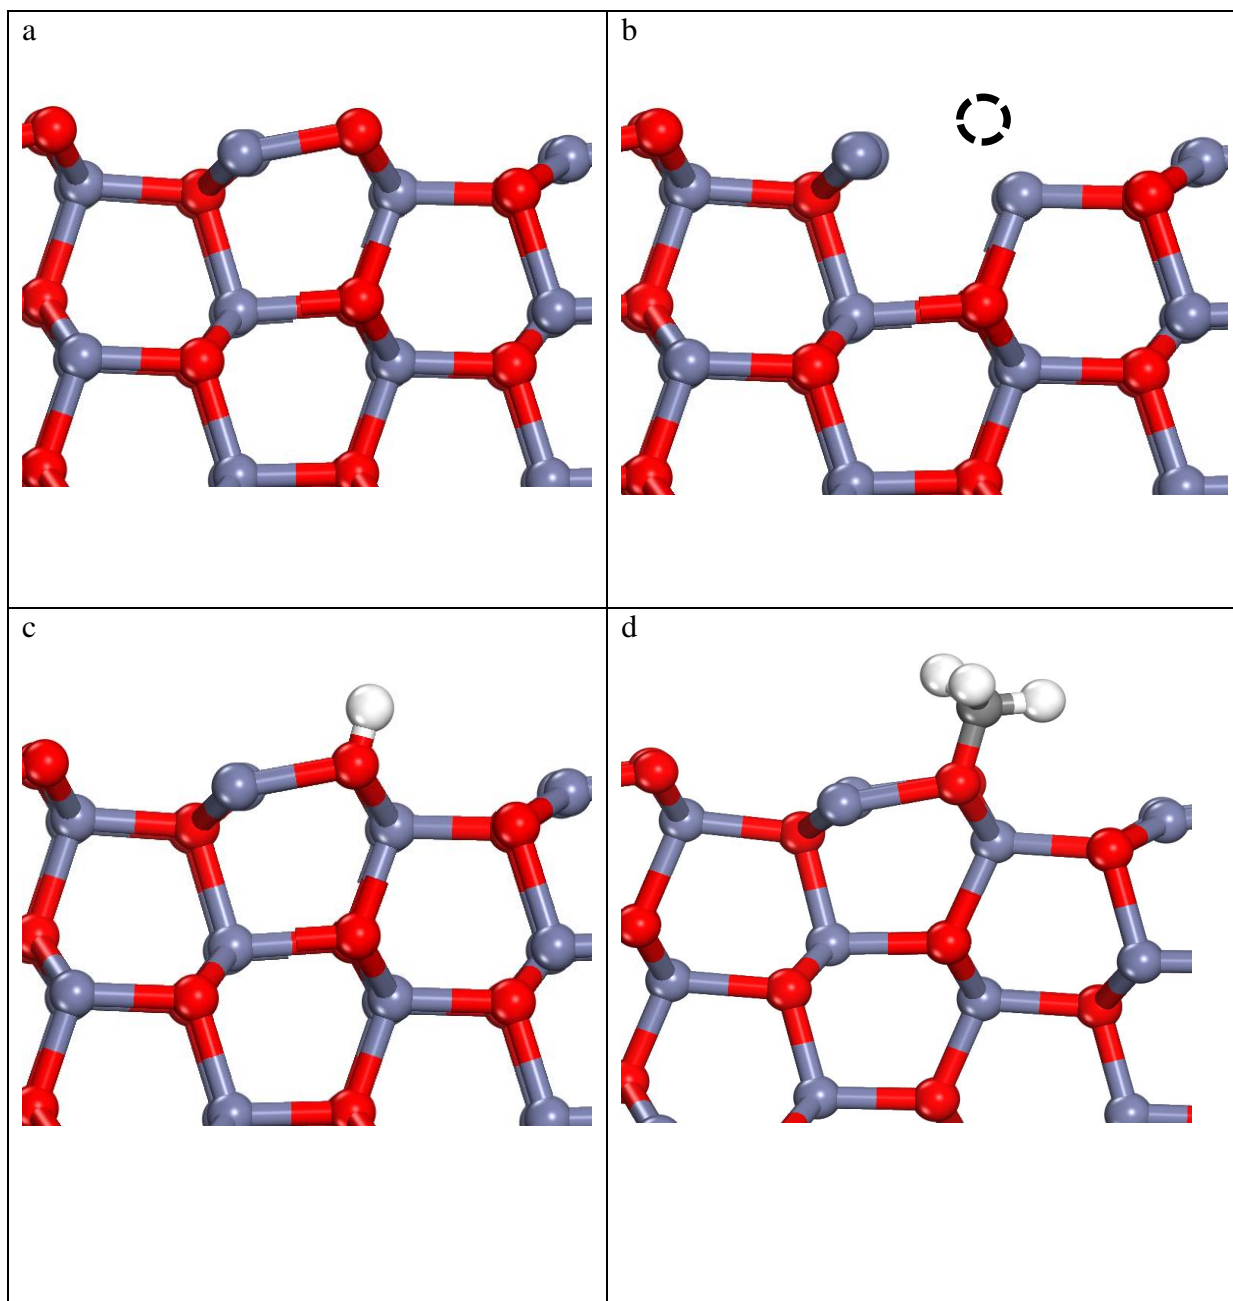

Side views of ZnO (110) a) bare surface, b) oxygen vacant surface (missing oxygen is shown as a dotted circle, with c) H adsorbed, and d)  $\cdot\text{CH}_3$  adsorbed. Zn is shown as grey (light), O is shown in red (dark), C in dark grey, and H in white.

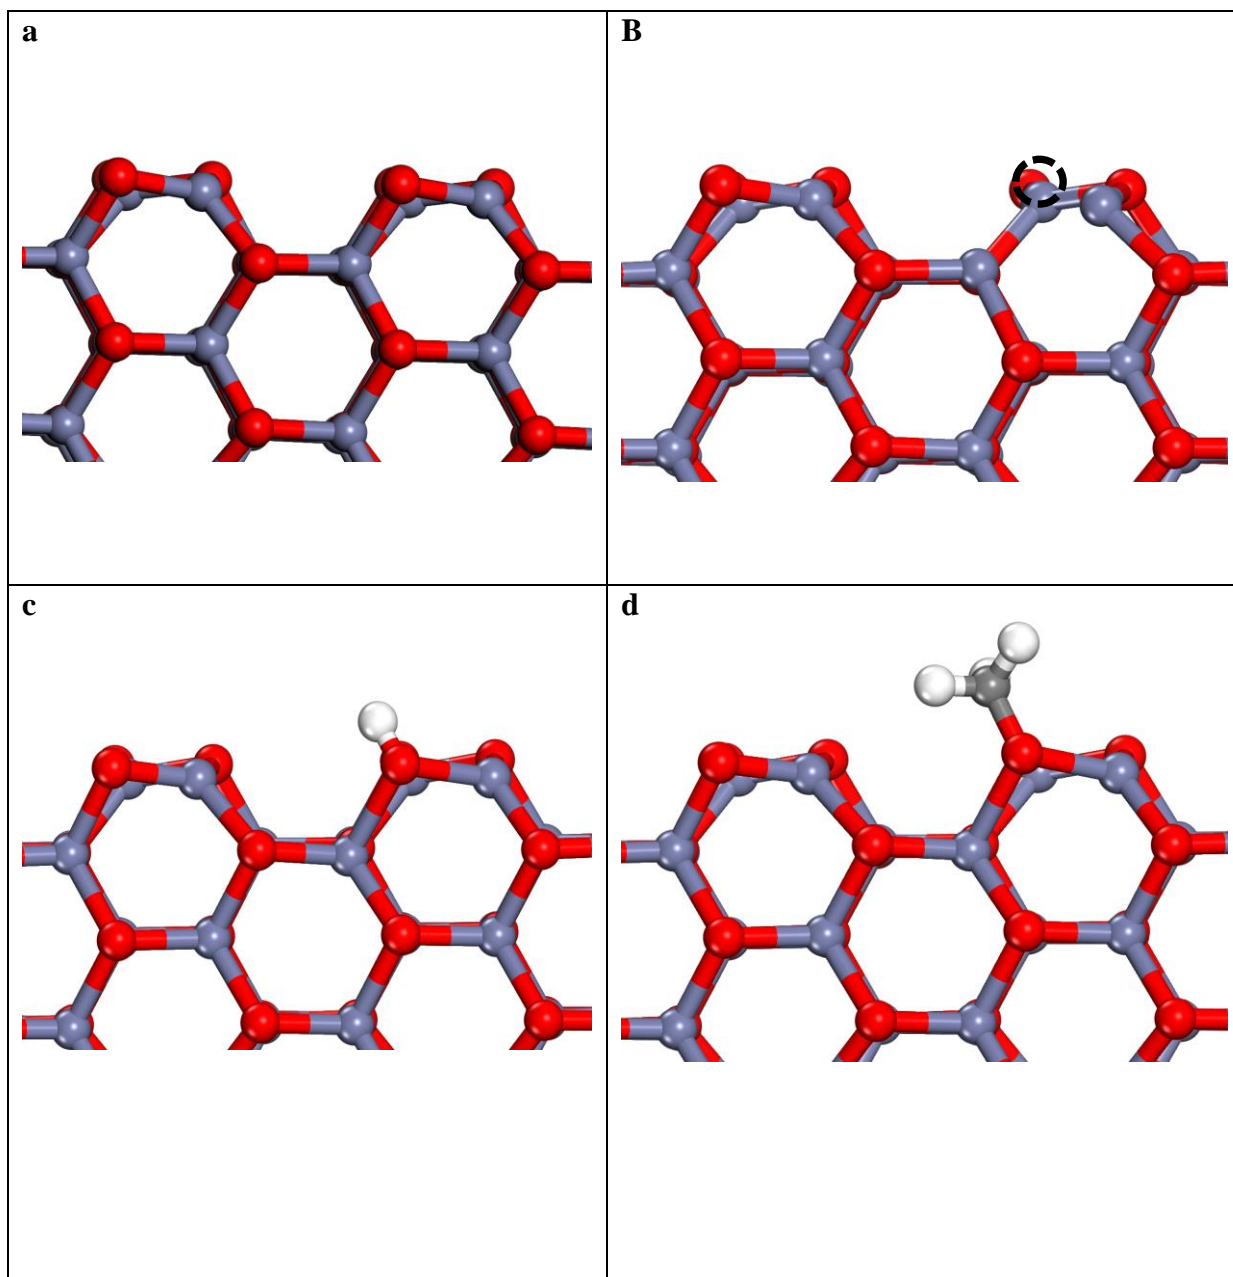

**Table S4.** Values for Fermi energy, energy in the vacuum and work function

| Metal oxide                      |           | Fermi energy,<br>$E_f$ (eV) | Energy in<br>vacuum, $E_v$<br>(eV) | Work function,<br>$\Phi$ (eV) |
|----------------------------------|-----------|-----------------------------|------------------------------------|-------------------------------|
| Host oxide                       | Dopants   |                             |                                    |                               |
| CeO <sub>2</sub> (111)           | Ag        | 0.01                        | 5.42                               | 5.41                          |
|                                  | Mn        | 0.68                        | 5.55                               | 4.87                          |
|                                  | Ni        | 0.41                        | 5.74                               | 5.33                          |
|                                  | Pd        | 0.15                        | 5.43                               | 5.28                          |
|                                  | Pt        | 0.22                        | 5.66                               | 5.44                          |
|                                  | V         | 0.49                        | 5.8                                | 5.32                          |
|                                  | W         | 0.98                        | 4.98                               | 4.00                          |
|                                  | Zn        | -0.63                       | 5.73                               | 6.35                          |
|                                  | Zr        | 1.29                        | 5.33                               | 4.03                          |
|                                  | No dopant | 0.53                        | 4.76                               | 4.23                          |
| MgO (100)                        | Be        | 1.55                        | 4.8                                | 3.25                          |
|                                  | Cu        | 1.37                        | 4.67                               | 3.25                          |
|                                  | Ga        | 1.63                        | 4.77                               | 3.23                          |
|                                  | Ge        | 1.53                        | 4.76                               | 2.59                          |
|                                  | Pd        | 0.87                        | 4.77                               | 3.90                          |
|                                  | No dopant | 1.39                        | 4.78                               | 3.39                          |
| Tb <sub>16</sub> O <sub>32</sub> |           | -2.20                       | 3.74                               | 5.95                          |
| Tb <sub>16</sub> O <sub>30</sub> |           | -2.04                       | 3.56                               | 5.59                          |
| Tb <sub>16</sub> O <sub>28</sub> |           | -2.08                       | 3.48                               | 5.57                          |
| Tb <sub>16</sub> O <sub>26</sub> |           | -1.52                       | 3.11                               | 4.63                          |
| Tb <sub>16</sub> O <sub>24</sub> |           | 0.77                        | 3.61                               | 2.85                          |
| Tb <sub>16</sub> O <sub>22</sub> |           | 0.66                        | 3.20                               | 2.54                          |

**Table S5.** Oxygen vacancy formation energy  $\Delta E_{vac}$ , C-H activation reaction energy  $\Delta E_{act}$ ,  $\cdot\text{CH}_3$  adsorption energy  $\Delta E_{ads}$  of all the pure/doped oxides used in the universal correlation

| Metal oxide            |                    | Oxygen vacancy formation energy, $\Delta E_{vac}$ (eV) | C-H activation reaction energy, $\Delta E_{act}$ (eV) | $\cdot\text{CH}_3$ adsorption energy, $\Delta E_{ads}$ (eV) |
|------------------------|--------------------|--------------------------------------------------------|-------------------------------------------------------|-------------------------------------------------------------|
| Host oxide             | Dopant             |                                                        |                                                       |                                                             |
| CeO <sub>2</sub> (111) | Ag                 | -0.35                                                  | 0.23                                                  | -3.71                                                       |
|                        | Mn                 | 0.68                                                   | 0.15                                                  | -3.11                                                       |
|                        | Ni                 | -0.10                                                  | -0.61                                                 | -4.16                                                       |
|                        | Pd                 | 0.59                                                   | 0.72                                                  | -3.07                                                       |
|                        | Pt                 | 0.47                                                   | 0.86                                                  | -2.94                                                       |
|                        | V                  | 1.23                                                   | 0.74                                                  | -2.94                                                       |
|                        | W                  | 1.93                                                   | 1.53                                                  | -2.33                                                       |
|                        | Zn                 | -1.13                                                  | -0.21                                                 | -4.02                                                       |
|                        | Zr                 | 1.63                                                   | 1.10                                                  | -2.72                                                       |
|                        | <i>U-value</i> = 0 | 3.40                                                   | 1.81                                                  | -1.93                                                       |
|                        | <i>U-value</i> = 1 | 3.45                                                   | 1.85                                                  | -1.89                                                       |
|                        | <i>U-value</i> = 2 | 3.39                                                   | 1.84                                                  | -1.90                                                       |
|                        | <i>U-value</i> = 3 | 3.45                                                   | 1.74                                                  | -1.93                                                       |
|                        | <i>U-value</i> = 4 | 3.08                                                   | 1.70                                                  | -2.11                                                       |
|                        | <i>U-value</i> = 5 | 2.76                                                   | 1.29                                                  | -2.34                                                       |
|                        | <i>U-value</i> = 6 | 2.45                                                   | 1.13                                                  | -2.57                                                       |
| CeO <sub>2</sub> (110) |                    | 2.00                                                   | 0.96                                                  | -2.46                                                       |
| MgO (100)              | No dopant          | 6.28                                                   | 4.37                                                  | 1.07                                                        |
|                        | Be                 | 5.89                                                   | 3.66                                                  | 0.27                                                        |
|                        | Cr                 | 5.99                                                   | 4.45                                                  | 1.09                                                        |
|                        | Cu                 | 4.82                                                   | 2.50                                                  | -0.97                                                       |
|                        | Eu                 | 6.08                                                   | 4.13                                                  | 0.78                                                        |
|                        | Fe                 | 5.73                                                   | 3.9                                                   | 0.56                                                        |
|                        | Ga                 | 5.28                                                   | 2.47                                                  | -0.83                                                       |
|                        | Ge                 | 5.92                                                   | 3.56                                                  | 0.49                                                        |
|                        | In                 | 5.03                                                   | 2.43                                                  | -0.94                                                       |
|                        | Li                 | 3.39                                                   | 0.50                                                  | -3.11                                                       |
|                        | Li <sup>#</sup>    | 5.43                                                   | 3.09                                                  | -0.45                                                       |
|                        | Li <sup>*</sup>    | 5.72                                                   | 2.73                                                  | -0.32                                                       |
|                        | Mn                 | 5.92                                                   | 4.30                                                  | 0.86                                                        |
|                        | Ni                 | 5.31                                                   | 3.09                                                  | -0.39                                                       |
|                        | Pd                 | 4.23                                                   | 2.95                                                  | -0.63                                                       |
| MgO (110)              |                    | 5.24                                                   | 2.99                                                  | -0.58                                                       |
| ZnO (001)              |                    | 3.28                                                   | 2.48                                                  | -1.20                                                       |
| ZnO(100)               |                    | 2.98                                                   | 2.30                                                  | -1.40                                                       |
| ZnO (110)              |                    | 2.81                                                   | 2.44                                                  | -1.27                                                       |

|                     |               |       |       |       |
|---------------------|---------------|-------|-------|-------|
| TiO <sub>2</sub>    | Ana 001       | 4.08  | 2.37  | -1.37 |
|                     | Ana100 (brg)  | 4.76  | 2.59  | -1.34 |
|                     | Ana100 (ip)   | 5.46  | 3.10  | -0.73 |
|                     | Ana101 (brg)  | 4.88  | 2.78  | -1.14 |
|                     | Ana101 (ip)   | 5.45  | 3.18  | -0.59 |
|                     | Ce            | 3.88  | 1.19  | -2.56 |
|                     | Fe            | 1.63  | 0.63  | -3.06 |
|                     | Fe and Ce     | 1.39  | 0.97  | -2.99 |
|                     | Rut 110 (brg) | 2.00  | 1.05  | -2.86 |
|                     | Zr            | 5.05  | 2.59  | -0.79 |
| TbO <sub>2</sub>    |               | -1.10 | -0.20 | -3.89 |
| TbO <sub>1.88</sub> |               | -0.56 | -0.18 | -3.78 |
| TbO <sub>1.75</sub> |               | -0.70 | -0.04 | -3.74 |
| TbO <sub>1.63</sub> |               | -0.21 | 0.08  | -3.62 |
| TbO <sub>1.5</sub>  |               | 5.75  | 2.95  | -0.72 |
| TbO <sub>1.38</sub> |               | 6.39  | 4.19  | 0.64  |

#,\* In these cases, 2 Mg atoms have been replaced by 2 Li atoms and one oxygen vacancy has been created to account for the loss of electrons. The calculations over a non-mirrored MgO (100) surface have then been performed over different surface oxygens (# and \*), and therefore, the second oxygen vacancy formation has been used as the surface reducibility descriptor.

brg represents the surface where the bridging oxygen is removed to represent the oxygen vacancy formation, while ip represents the vacancy formation of the in surface place oxygen.

**Table S6.** Statistical details of the correlation between C-H bond activation of methane  $\Delta E_{act}$  and the oxygen vacancy formation energy  $\Delta E_{vac}$ , and the  $-\text{CH}_3$  adsorption energy  $\Delta E_{ads}$  and the oxygen vacancy formation energy  $\Delta E_{vac}$

Linear regression analysis on predictor y using response x:

Model:  $y = Ax + B$

| Data                     | y                 | x                | A      | B      | $R^2$ | 95% CI         |               |
|--------------------------|-------------------|------------------|--------|--------|-------|----------------|---------------|
|                          |                   |                  |        |        |       | A              | B             |
| Overall                  | $\Delta E_{act}$  | $\Delta E_{vac}$ | 0.569  | 0.081  | 0.88  | 0.510, 0.629   | -0.157, 0.320 |
|                          | $-\Delta E_{ads}$ | $\Delta E_{vac}$ | -0.616 | 3.687  | 0.88  | -0.681, -0.552 | 3.430, 3.945  |
| CeO <sub>2</sub> U value | $\Delta E_{act}$  | $\Delta E_{vac}$ | 0.703  | -0.584 | 0.95  | 0.508, 0.897   | -1.199, 0.032 |
|                          | $-\Delta E_{ads}$ | $\Delta E_{vac}$ | -0.664 | 4.179  | 0.99  | -0.737, -0.591 | 3.950, 4.409  |
| TiO <sub>2</sub> facet   | $\Delta E_{act}$  | $\Delta E_{vac}$ | 0.595  | -0.131 | 0.99  | 0.525, 0.666   | -0.457, 0.195 |
|                          | $-\Delta E_{ads}$ | $\Delta E_{vac}$ | -0.614 | 4.063  | 0.97  | -0.764, -0.463 | 3.371, 4.755  |
| TbO <sub>x</sub>         | $\Delta E_{act}$  | $\Delta E_{vac}$ | 0.548  | 0.259  | 0.97  | 0.429, 0.667   | -0.165, 0.682 |
|                          | $-\Delta E_{ads}$ | $\Delta E_{vac}$ | -0.557 | 3.407  | 0.97  | -0.688, -0.426 | 2.942, 3.873  |

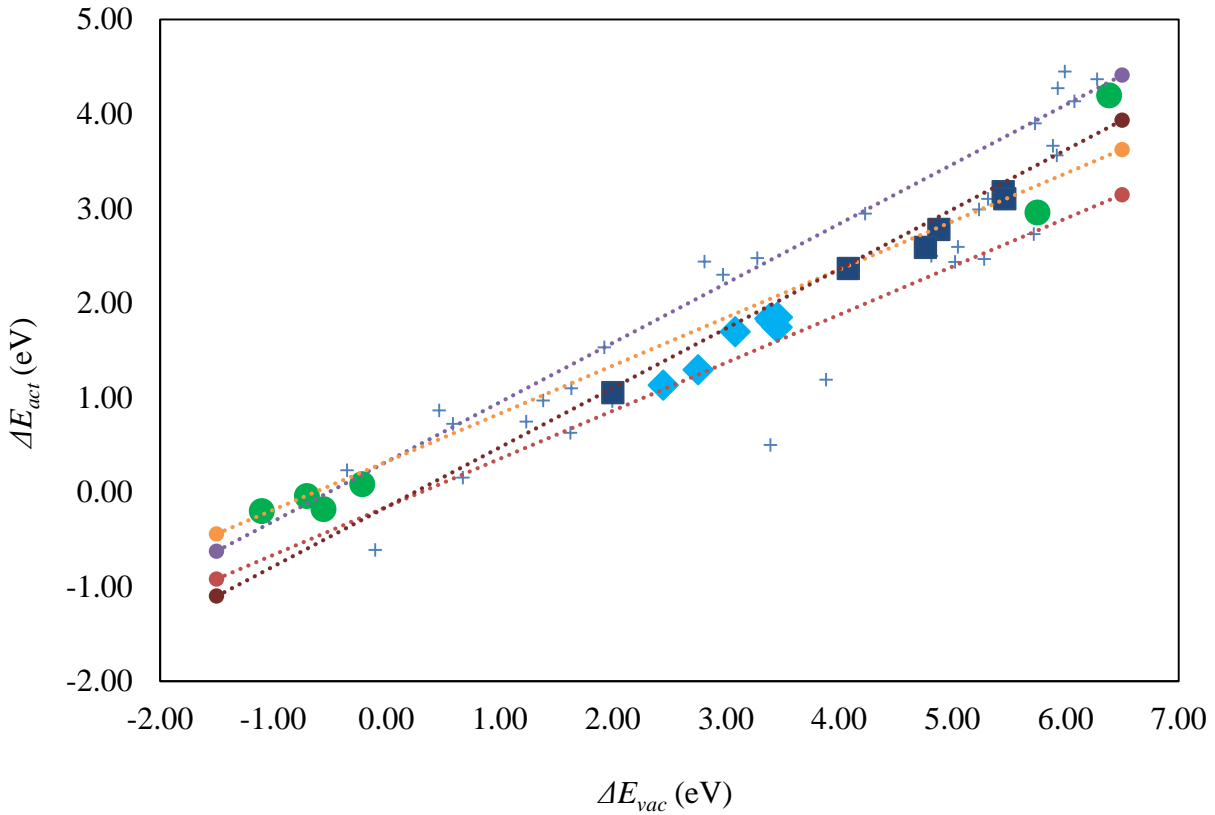

Here, the four dotted lines represent the regression lines with 95% CI coefficients, A and B. All the sub-correlations: varying the U-value for Ce in CeO<sub>2</sub> (◆), the surface facets for TiO<sub>2</sub> (■) and the oxidation state for TbO<sub>x</sub> (●) lie within this confidence interval.

**Table S7.** The position of oxygen vacancies in various stable oxidation states of  $\text{TbO}_x$  in a mirrored  $\text{Tb}_{16}\text{O}_{32}$  surface slab

| $\text{TbO}_x$      | Stoichiometry                 | Vacancy |      |      |      | Total number of oxygen vacancies* |
|---------------------|-------------------------------|---------|------|------|------|-----------------------------------|
|                     |                               | Top     | Sub1 | Sub2 | Sub3 |                                   |
| $\text{TbO}_2$      | $\text{Tb}_{16}\text{O}_{32}$ | 0       | 0    | 0    | 0    | 0                                 |
| $\text{TbO}_{1.88}$ | $\text{Tb}_{16}\text{O}_{30}$ | 0       | 0    | 1    | 0    | 2                                 |
| $\text{TbO}_{1.75}$ | $\text{Tb}_{16}\text{O}_{28}$ | 1       | 0    | 1    | 0    | 4                                 |
| $\text{TbO}_{1.63}$ | $\text{Tb}_{16}\text{O}_{26}$ | 2       | 0    | 1    | 0    | 6                                 |
| $\text{TbO}_{1.5}$  | $\text{Tb}_{16}\text{O}_{24}$ | 2       | 0    | 2    | 0    | 8                                 |
| $\text{TbO}_{1.38}$ | $\text{Tb}_{16}\text{O}_{22}$ | 4       | 0    | 1    | 0    | 10                                |

\*Since we use a mirrored surface, total number of oxygen vacancies is twice the number of vacancies in a particular surface layer.

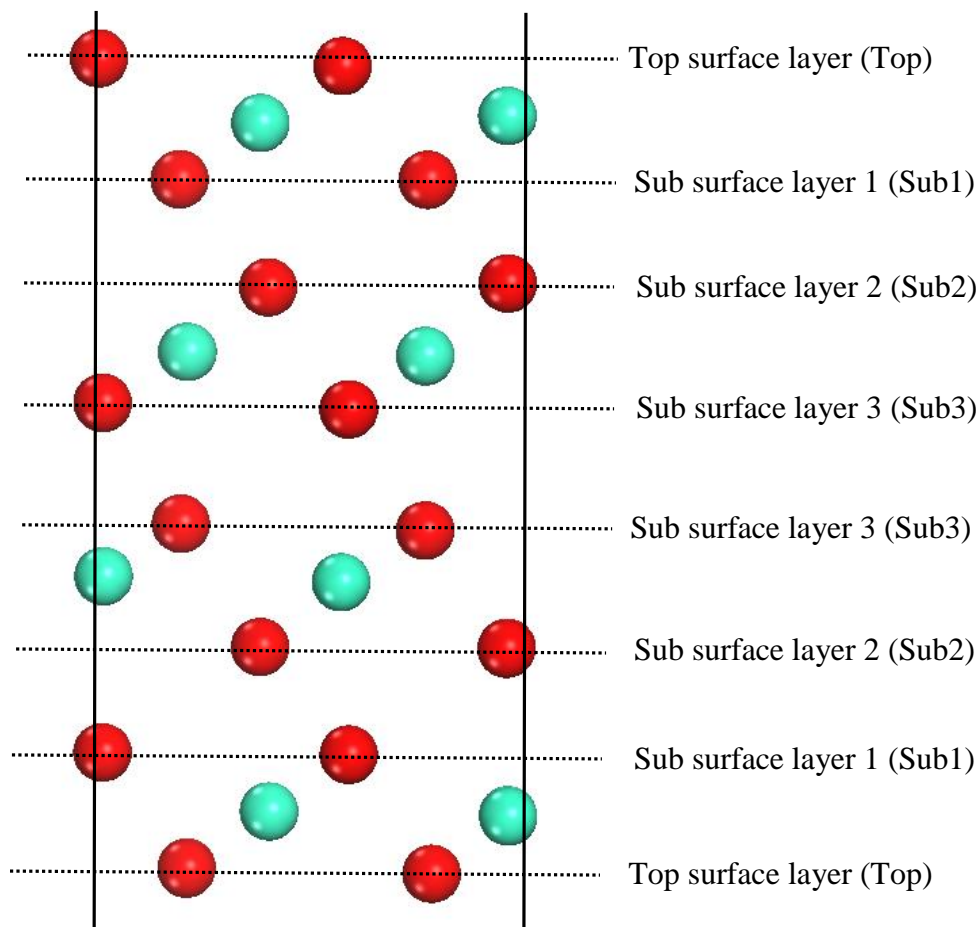

Supplement: Supplementary file 1 [file 3884092]
